# Supplementary material for: Electron delocalization of robust high-nuclear bismuth-oxo clusters for promoted CO2electroreduction
Source: Royal Society of Chemistry journal article supplement (doi:10.1039/d3sc02924g), 2023-01-01
Supplement: d3sc02924g1.pdf [file d3sc02924g1.pdf]

# Supporting Information

## Electron Delocalization of Robust High-nuclear Bismuth-oxo Clusters for Promoted CO<sub>2</sub> Electroreduction

Baoshan Hou<sup>+</sup>, Haiyan Zheng<sup>+</sup>, Kunhao Zhang, Qi Wu, Chao Qin, Chunyi Sun<sup>\*</sup>, Qinhe Pan, Zhenhui Kang, Xinlong Wang<sup>\*</sup> and Zhongmin Su

Dr. B. Hou, H. Zheng, Q. Wu, Prof. C. Qin, C. Sun, X. Wang,

Key Lab of Polyoxometalate Science of Ministry of Education, National & Local United Engineering

Laboratory for Power Battery Institution. Northeast Normal University. Changchun, Jilin, 130024 (China)

E-mail: [suncy009@nenu.edu.cn](mailto:suncy009@nenu.edu.cn), [wangxl824@nenu.edu.cn](mailto:wangxl824@nenu.edu.cn)

Prof. Q. Pan, X. Wang, Z. Su

Key Laboratory of Advanced Materials of Tropical Island Resources, Ministry of Education, Hainan University, Haikou, 570228 (China)

Dr. K. Zhang

Shanghai Synchrotron Radiation Facility (SSRF), 239 Zhangheng Road, Pudong New District, Shanghai, 200120 (China)

Prof. Z. Kang

Institute of Functional Nano & Soft Materials (FUNSOM), Jiangsu Key Laboratory for Carbon-Based Functional Materials & Devices, Soochow University, Suzhou 215123 Jiangsu, China.

## Experimental Procedures

### General Experimental Section

All the reagents were obtained from commercial sources and used without further purification. Powder X-ray diffraction (PXRD) patterns were recorded ranging from 5 to 50° at room temperature on a Siemens D5005 diffractometer with Cu K $\alpha$  ( $\lambda = 1.5418 \text{ \AA}$ ). The C, H and N elemental analyses were conducted on a Perkin–Elmer 2400CHN elemental analyzer. Thermogravimetric analysis (TGA) of the samples were performed using a Perkin–Elmer TG–7 analyzer heated from room temperature to 800 °C under nitrogen at the heating rate of 10 °C·min<sup>-1</sup>. IR spectrum was performed in the range 4000–400 cm<sup>-1</sup> using KBr pellets on an Alpha Centaur FT/IR spectrophotometer. X-ray photoelectron spectroscopy (XPS) characterizations were performed on an Escalab 250 instrument. Scanning electron microscopy (SEM, Hitachi, SU–70) was utilized to obtain the morphology and structure of the samples. In situ IR was carried out on a 6700 Flex FTIR spectrometer equipped with a smart iTRTM attenuated total reflectance (ATR) sampling accessory in the range of 500–4000 cm<sup>-1</sup>. In situ Raman measurements were carried out by using a 785 nm diode laser with the power of 10 mW and a Raman spectrometer (iHR 550, Symphony II, Horiba Jobin Yvon).

### Synthesis of BiOC–1

A mixture of TBC[8] (50 mg), Bi(NO<sub>3</sub>)<sub>3</sub> (50 mg) was dissolved in CH<sub>3</sub>OH (10 mL) and en (0.2 mL). The mixture was transferred into a Parr Teflon–lined autoclave and kept at 130 °C for 72 h. After cooling down to room temperature, the pale yellow bulk crystals were obtained and washed with CH<sub>3</sub>OH (yield: 82 % based on Bi). Elemental analysis (%): calculated for **BiOC–1**, C 47.70, H 5.73, N 1.14; found, C 47.82, H 5.85, N 1.29.

### Synthesis of BiOC–2

A mixture of TBC[8] (50 mg), Bi(NO<sub>3</sub>)<sub>3</sub> (50 mg) was dissolved in CH<sub>3</sub>OH (10 mL) and en (0.2 mL). The mixture was transferred into a Parr Teflon–lined autoclave and kept at 100 °C for 72 h. After cooling down to room temperature, the pale yellow bulk crystals were obtained and washed with CH<sub>3</sub>OH (yield: 12 % based on Bi).

### Synthesis of BiOC–3

A mixture of TBC[8] (40 mg), Bi(NO<sub>3</sub>)<sub>3</sub> (30 mg), Al(NO<sub>3</sub>)<sub>3</sub> (10 mg) was dissolved in DMF (5 mL), CH<sub>3</sub>OH (5 mL) and en (0.2 mL). The mixture was transferred into a Parr Teflon–lined autoclave and kept at 130 °C for 72 h. After cooling down to room temperature, the yellow flake crystals were obtained and washed with CH<sub>3</sub>OH (yield: 78 % based on Bi). Elemental analysis (%): calculated for **BiOC–3**, C 48.03, H 5.05, N 0.31; found, C 48.22, H 5.15, N 0.45.

### Synthesis of BiOC–4

A mixture of TBC[8] (30 mg), Bi(NO<sub>3</sub>)<sub>3</sub> (30 mg) was dissolved in DMF (5 mL), CH<sub>3</sub>OH (5 mL) and en (0.2 mL). The mixture was transferred into a Parr Teflon–lined autoclave and kept at 130 °C for 72 h. After cooling down to room temperature, the light yellow massive crystals were obtained and washed with CH<sub>3</sub>OH (yield: 71 % based on Bi). Elemental analysis (%): calculated for **BiOC–4**, C 38.33, H 4.25, N 1.36; found, C 38.22, H 4.15, N 1.45.

### Synthesis of BiOC–5

A mixture of TBC[8] (50 mg), Bi(NO<sub>3</sub>)<sub>3</sub> (50 mg) was dissolved in DMF (2 mL), CH<sub>3</sub>OH (5 mL) and en (0.2 mL). The mixture was transferred into a Parr Teflon–lined autoclave and kept at 130 °C for 72 h. After cooling down to room temperature, the yellow octahedral or poke–shaped crystals were obtained and washed with CH<sub>3</sub>OH (yield: 73 % based on Bi). Elemental analysis (%): calculated for **BiOC–5**, C 40.11, H 4.47, N 0.73; found, C 40.22, H 4.65, N 0.94.

### Synthesis of BiOC–6

A mixture of TBC[8] (50 mg), Bi(NO<sub>3</sub>)<sub>3</sub> (30 mg), Molybdic acid (10 mg) was dissolved in DMF (2 mL), CH<sub>3</sub>OH (8 mL) and en (0.2 mL). The mixture was transferred into a Parr Teflon–lined autoclave and kept at 130 °C for 72 h. After cooling down to room temperature, the light yellow small grain crystals were obtained and washed with CH<sub>3</sub>OH (yield: 5 % based on Bi). Elemental analysis (%): calculated for **BiOC–6**, C 53.09, H 6.93, N 5.71; found, C 52.22, H 6.55, N 5.84.

### The preparation of the working electrode

10 mg of samples were added to a 1 mL solution containing ethanol (100 $\mu$ L) water (800 $\mu$ L) and Nafion solution (5wt%, 100  $\mu$ L) to produce a suspension. After sonicating for 30 min, 25  $\mu$ L uniformly mixed suspension was dropped onto a hydrophobic carbon paper (1  $\times$  2 cm) to form a 1 $\times$ 1 cm<sup>2</sup> catalyst area with a catalyst loading density of  $\sim$ 0.5 mg cm<sup>-2</sup>.

## Electrochemical measurements

All electrochemical tests of the catalysts were performed on a CHI-760E electrochemical workstation at room temperature and under ambient conditions. An airtight H-type cell separated by a cation exchange membrane (Nafion®117, dupont) was used as a reactor. Each compartment contained 30 mL electrolyte with approximately 20 mL headspace. Ag/AgCl electrode (saturated KCl) and carbon rod were used as the reference electrode and the counter electrode, respectively. The working electrode was a catalyst-modified carbon paper (1 cm × 2 cm). The polarization curves results were obtained by performing linear sweep voltammetry (LSV) mode with a scan rate of 5 mV s<sup>-1</sup>. Potentials were measured against an Ag/AgCl reference electrode and the results were converted to those against a reversible hydrogen electrode (RHE) based on the RHE calibration. All the curves were presented without IR compensation.

## The product analysis

The gaseous reduction products of CO<sub>2</sub> reduction reaction were monitored by Shimadzu Gas Chromatography (GC). The electrolyte solution was collected from the cathode chamber after electrolysis to analyze liquid products and characterized by <sup>1</sup>H-NMR and ion chromatography. The ion chromatograph was equipped with a Shodex IC SI-52 4E anion separation column with an eluent of 0.07 mmol L<sup>-1</sup> Na<sub>2</sub>CO<sub>3</sub>.

The FE<sub>products</sub> was calculated according to the following equation:

$$FE_{\text{products}} = \frac{N \times F \times n_{\text{products}}}{Q} \times 100\%$$

Where N is the number of electrons transferred for products. (N = 2 for CO<sub>2</sub> to HCOOH and CO conversion and H<sub>2</sub>O to H<sub>2</sub> conversion), F is the Faraday constant (96485 C/mol), n<sub>products</sub> is the moles of produced products (mol), and Q is the total charge obtained from chronoamperometry (C).

The TOF for HCOOH was calculated as follow:

$$TOF = \frac{I_{\text{product}} NF}{m_{\text{cat}} \times \omega / M_{\text{Bi}}} \times 3600$$

*I<sub>product</sub>*: partial current for certain product, HCOOH;

*N*: the number of electron transferred for product formation, which is 2 for HCOOH;

*F*: Faradaic constant, 96485 C mol<sup>-1</sup>;

*m<sub>cat</sub>*: catalyst mass in the electrode, g;

*ω*: Bi loading in the catalyst;

*M<sub>Bi</sub>*: atomic mass of Bi, 208.98 g mol<sup>-1</sup>.

## Computational details

All the calculations are performed within the framework of DFT implemented in the Vienna ab initio simulation package (VASP).<sup>[1-3]</sup> The generalized gradient approximation with the function is described by the Perdew–Burke–Ernzerhof type (PBE).<sup>[4]</sup> The projector–augmented wave (PAW) method<sup>[5]</sup> is applied to describe the wavefunctions in the core regions, while the valence wavefunctions are expanded as linear combination of plane–waves with a cutoff energy of 400 eV. The total energy is converged to 10<sup>-5</sup> eV in the geometry optimizations, and the Hellmann–Feynman force on each relaxed atom is less than 0.02 eV/Å.<sup>[6-7]</sup>

Gibbs reaction free energy of reaction for CO<sub>2</sub>RR elementary steps involving (H<sup>+</sup> + e<sup>-</sup>) pair transfer was calculated using computational hydrogen electrode (CHE) model.<sup>[8]</sup> At U=0 V, ΔG = ΔE + ΔE<sub>ZPE</sub> - TΔS + C<sub>p</sub>dT, where ΔE is the reaction energy difference between the product and reactant of the CO<sub>2</sub>RR occurring on catalysts, which can be directly obtained from DFT computations; ΔE<sub>ZPE</sub>, TΔS and C<sub>p</sub>dT are zero–point energy correction, entropy correction and enthalpic temperature correction at T=298.15 K respectively, which were calculated from the vibrational frequencies.

The vertical ionization energy for BiOC-4 versus BiOC-5 in the Gaussian16 package,<sup>[9]</sup> and to conserve computational resources, we simplified the tert butyl groups of the end groups of the crystal materials, we used the B3LYP functional during the calculations,<sup>[10,11]</sup> 6-311G basis sets for C, H, and O atoms, and Lanl2dz basis sets for Bi. The ODI values of LUMO orbitals of materials using Gaussian 16 software combined with multiwfn3.8 software.<sup>[12,13]</sup>

## Crystal data collection and refinements

All data collections were performed on a Bruker D8–Venture diffractometer with a TurboX–ray Source (Cu Kα radiation, λ = 1.5418 Å) adopting the direct drive rotating anode technique and a CMOS detector at 173 K. The data frames were collected

using the program APEX 3 and processed using the program SAINT routine in APEX 3. The structures were solved by direct methods and refined by the full matrix least-squares on  $F^2$  using the SHELXL-2014 program. The diffused electron densities resulting from these residual solvent molecules were removed from the data set using the SQUEEZE routine of PLATON and refined further using the data generated. The restrained DFIX, SIMU, ISOR instructions were used to make the structures more reasonable. The formula unit was obtained through a combination of elemental analyses and thermogravimetric characterization. CCDC numbers of 2236082 for **BiOC-1**, 2236083 for **BiOC-2**, 2236084 for **BiOC-3**, 2236085 for **BiOC-4**, 2236086 for **BiOC-5**, 2236087 for **BiOC-6**.

## Results and Discussion

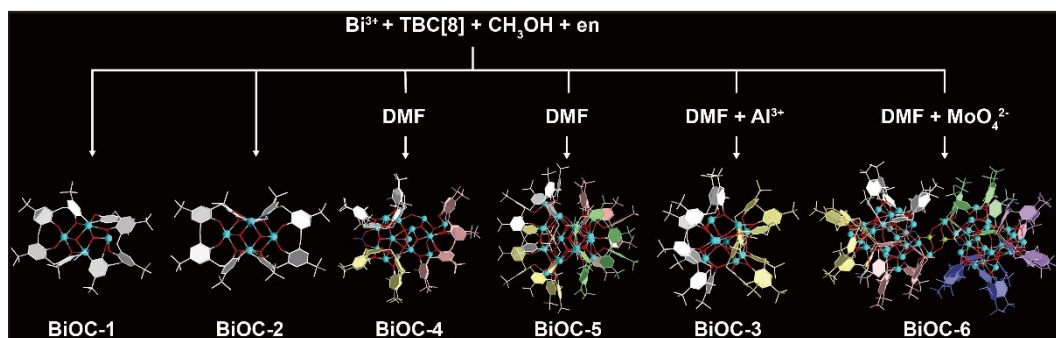

Figure S1. Synthesis of the BiOCs.

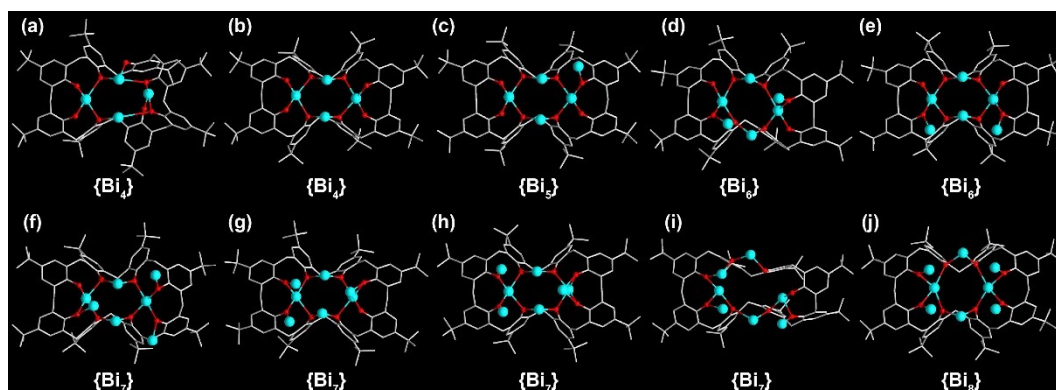

Figure S2.  $\text{Bi}_4$ – $\text{Bi}_8$  subunits in BiOCs. (a)  $\text{Bi}_4$  subunit in **BiOC-1**. (b)  $\text{Bi}_4$  subunit in **BiOC-2**. (c)  $\text{Bi}_5$ , (e)  $\text{Bi}_6$  and (f)  $\text{Bi}_7$  subunits in **BiOC-4**. (d)  $\text{Bi}_6$  subunit in **BiOC-3**. (g)  $\text{Bi}_7$  subunit in **BiOC-5**. (h)  $\text{Bi}_7$ , (i)  $\text{Bi}_7$  and (j)  $\text{Bi}_8$  subunits in **BiOC-6**.

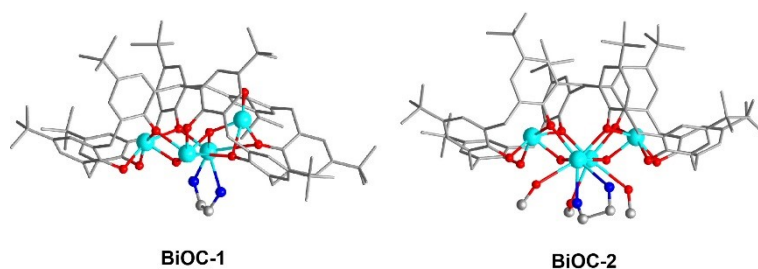

Figure S3. A comparison of the crystal structures of **BiOC-1** and **BiOC-2**.

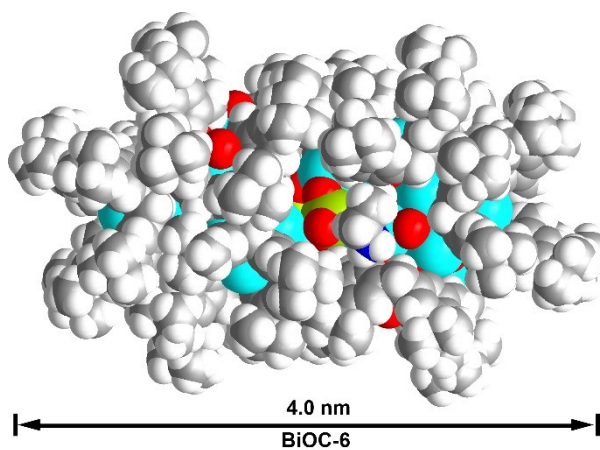

Figure S4. The structures of BiOC-6.

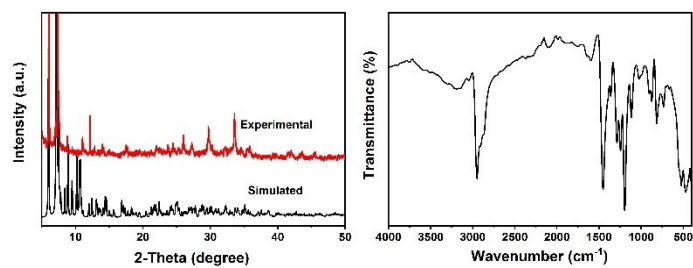

Figure S5. PXRD pattern and FT-IR spectrum for BiOC-1.

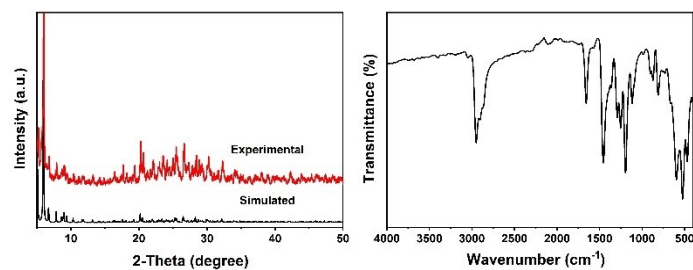

Figure S6. PXRD pattern and FT-IR spectrum for BiOC-3.

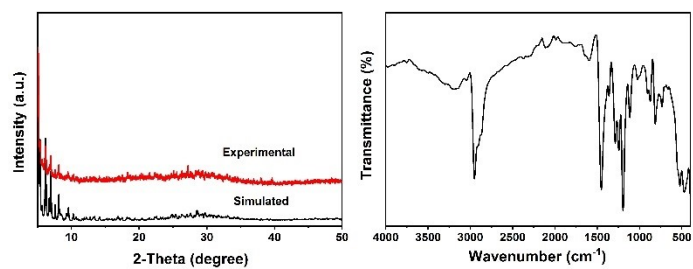

Figure S7. PXRD pattern and FT-IR spectrum for BiOC-4.

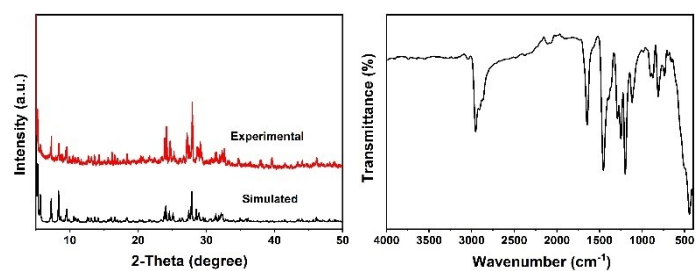

Figure S8. PXRD pattern and FT-IR spectrum for **BiOC-5**.

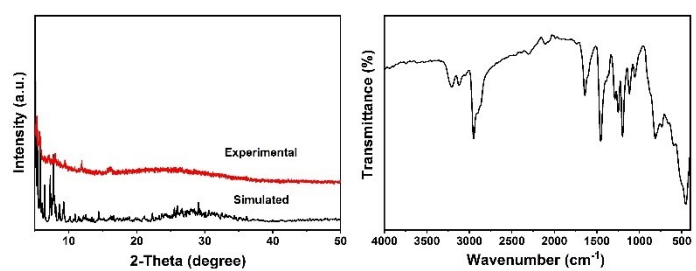

Figure S9. PXRD pattern and FT-IR spectrum for **BiOC-6**.

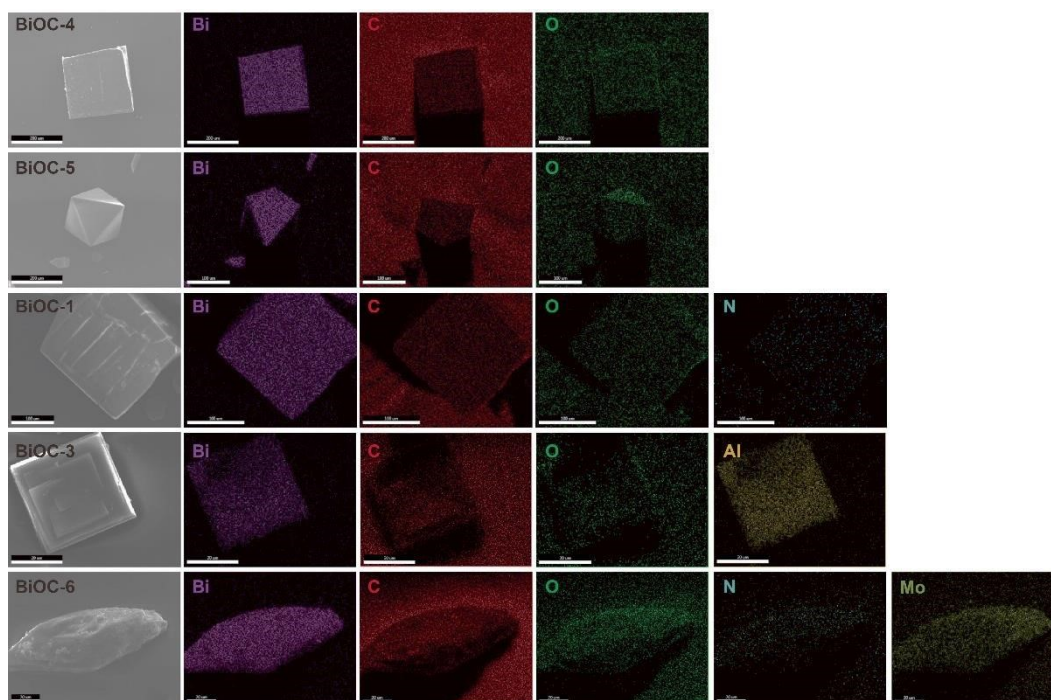

Figure S10. The SEM images and elemental mapping of **BiOC-4**, **BiOC-5**, **BiOC-1**, **BiOC-3** and **BiOC-6**.

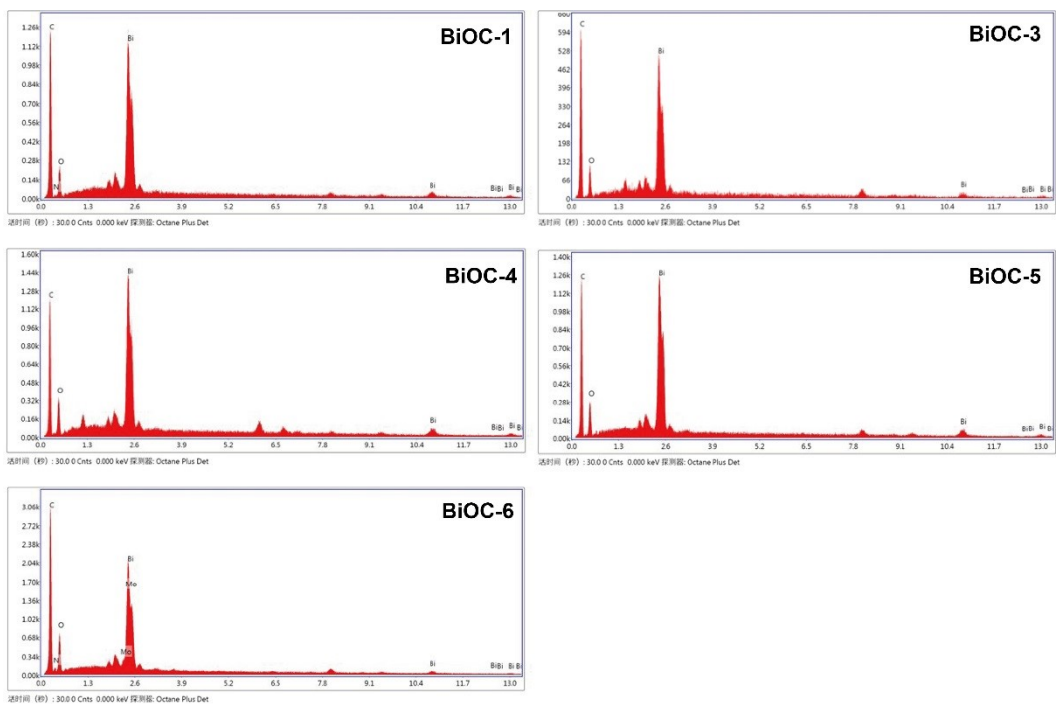

Figure S11. The EDS spectra of BiOC-1, BiOC-3, BiOC-4, BiOC-5 and BiOC-6.

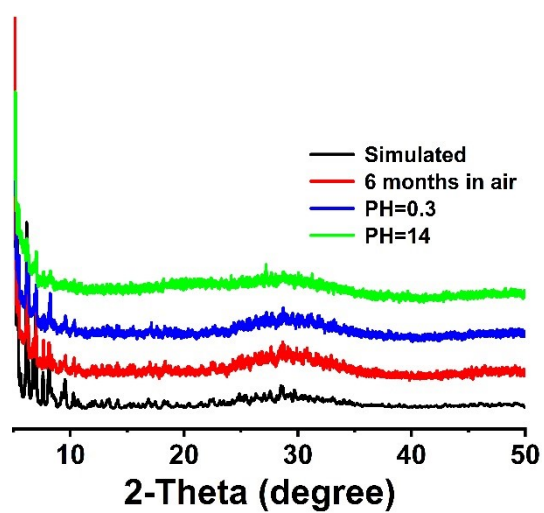

Figure S12. The PXRD patterns of BiOC-4 treated in air and different pH solutions.

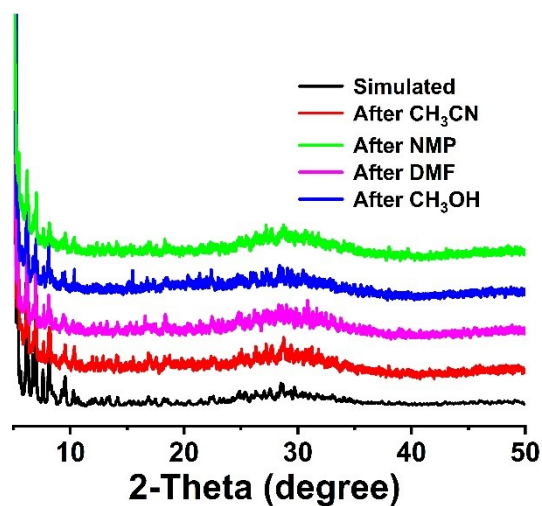

Figure S13. PXRD patterns of BiOC-4 after being treated in different organic solvents for 24 h.

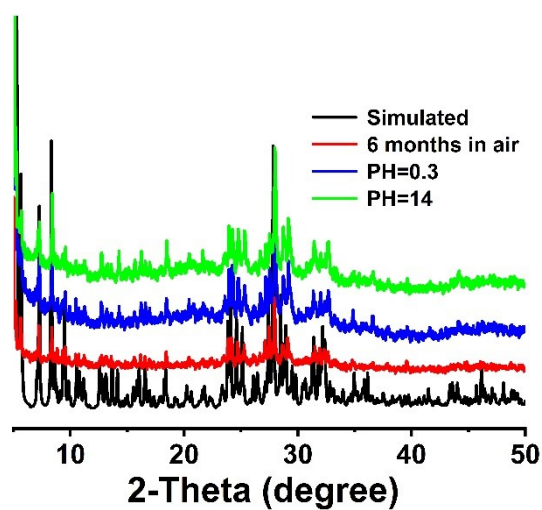

Figure S14. The PXRD patterns of BiOC-5 treated in air and different pH solutions.

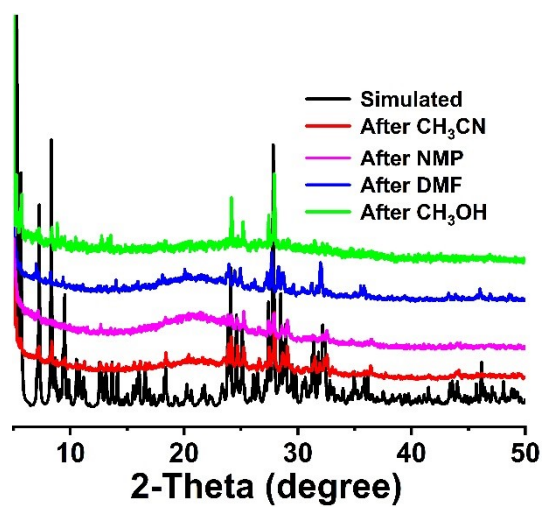

Figure S15. PXRD patterns of BiOC-5 after being treated in different organic solvents for 24 h.



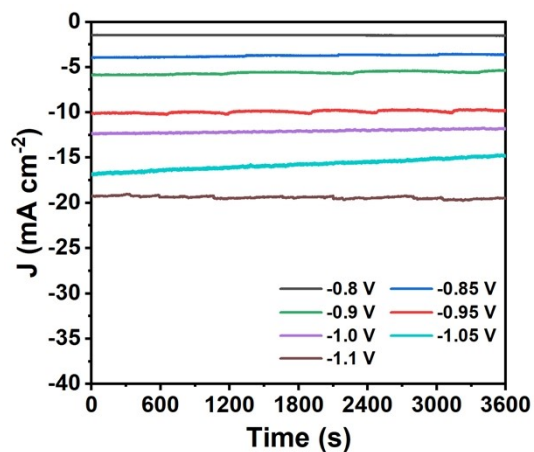

Figure S16. Chrono-amperometric I-t plot at different potentials (V vs. RHE) for BiOC-4.

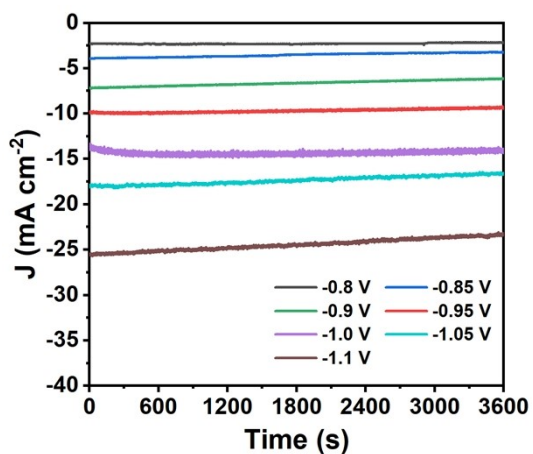

Figure S17. Chrono-amperometric I-t plot at different potentials (V vs. RHE) for BiOC-5.

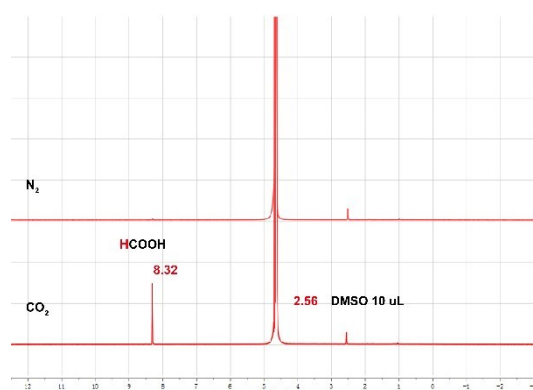

Figure S18. Representative <sup>1</sup>H NMR spectra obtained from the catholyte (30 mL) of  $\text{CO}_2$  reduction BiOC-5 at -0.95 V vs. RHE in 0.5 M  $\text{KHCO}_3$ . DMSO is used as an internal standard for quantification of liquid products (10  $\mu\text{L}$  DMSO, 200  $\mu\text{L}$   $\text{D}_2\text{O}$  and 500  $\mu\text{L}$  catholyte).

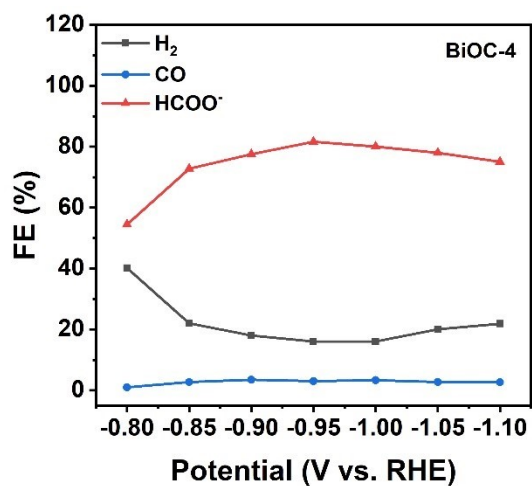

Figure S19. FEs of HCOO<sup>-</sup>, CO and H<sub>2</sub> at various applied potentials on BiOC-4.

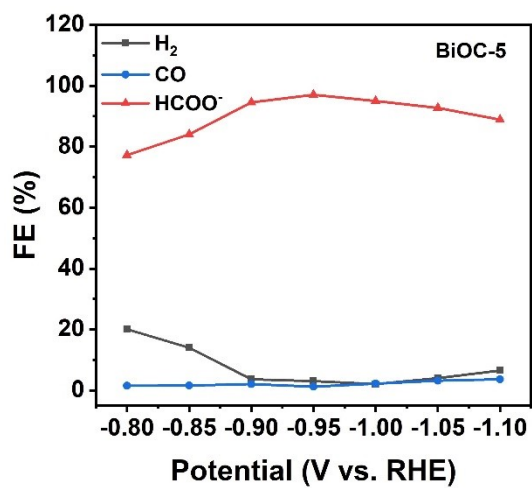

Figure S20. FEs of HCOO<sup>-</sup>, CO and H<sub>2</sub> at various applied potentials on BiOC-5.

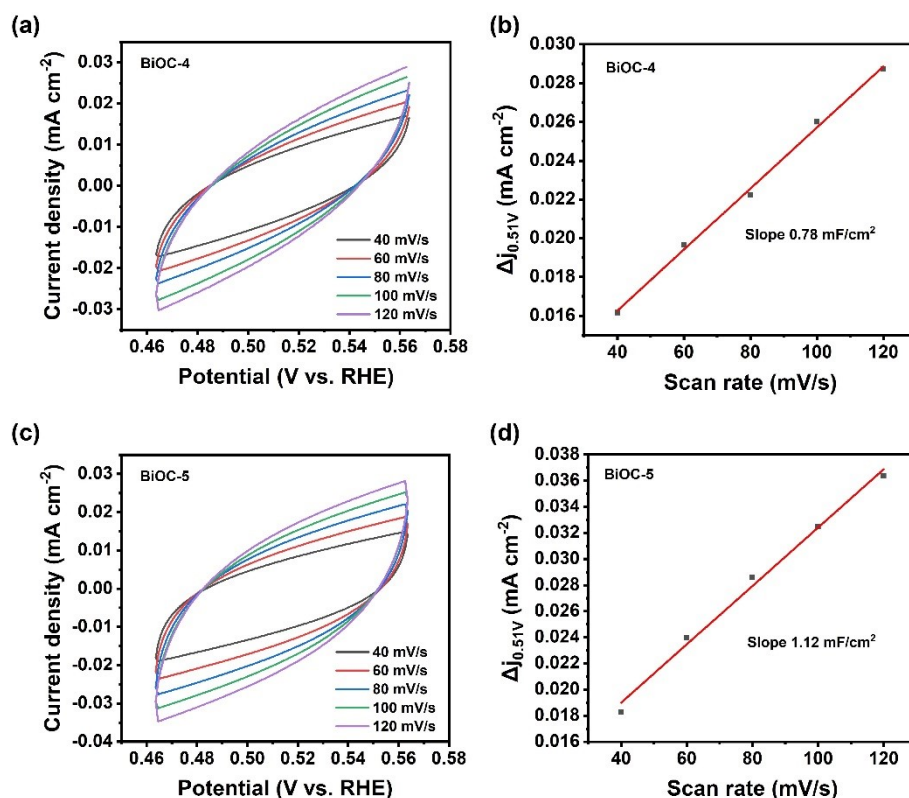

**Figure S21.** Cyclic voltammograms at the range of 0.46 to 0.56 V with different scan rates (40, 60, 80, 100, and 120 mV·s<sup>-1</sup>) for **BiOC-4** (a) and **BiOC-5** (c). Linear fitting of double-layer capacitive currents  $\Delta j$  ( $j_a - j_c$ ) at 0.51 V (vs. RHE) vs. scan rates to estimate ECSA for **BiOC-4** (b) and **BiOC-5** (d).

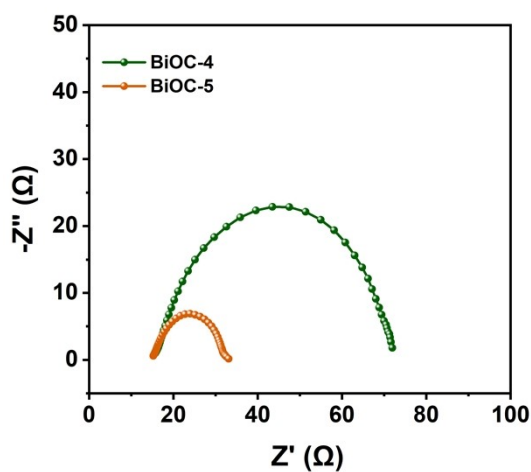

**Figure S22.** Nyquist plots for the **BiOC-4** and **BiOC-5**.

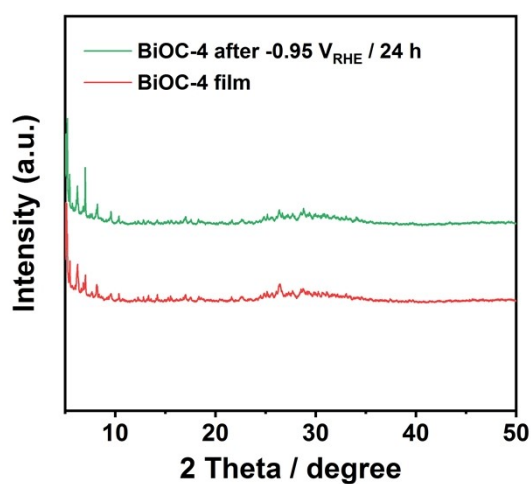

Figure S23. XRD patterns of BiOC-4 before and after 24 h electrocatalysis.

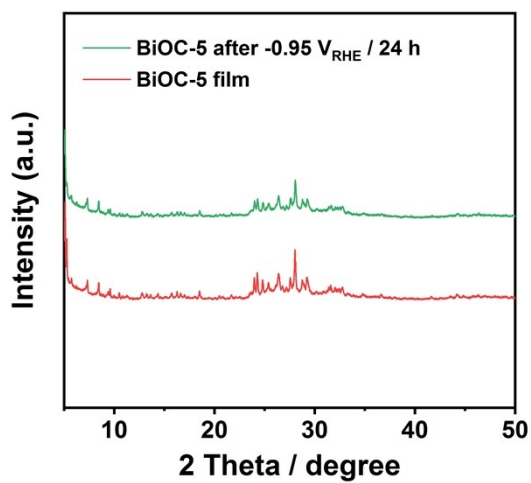

Figure S24. XRD patterns of BiOC-5 before and after 24 h electrocatalysis.

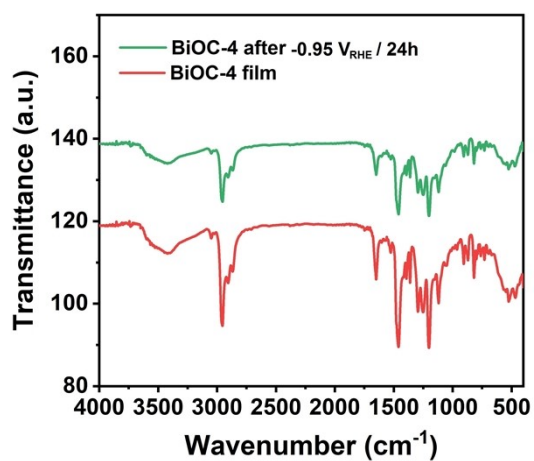

Figure S25. FT-IR spectra of BiOC-4 before and after 24 h electrocatalysis.

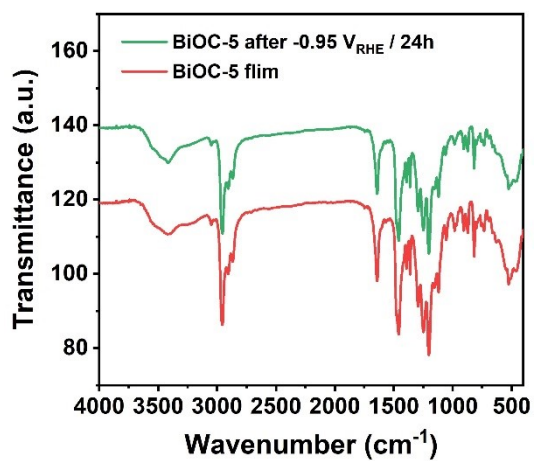

Figure S26. FT-IR spectra of BiOC-5 before and after 24 h electrocatalysis.

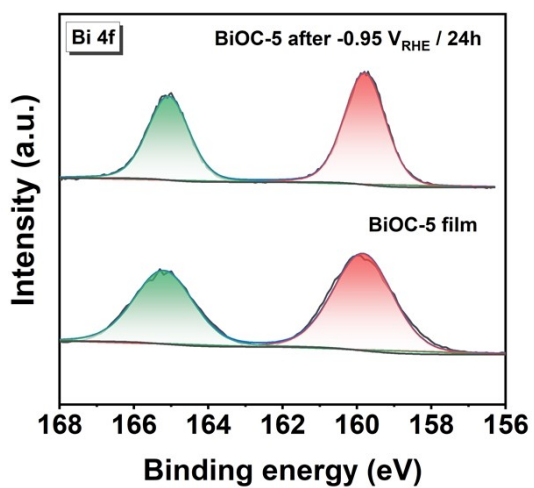

Figure S27. Bi 4f XPS spectra of BiOC-5 before and after 24 h electrocatalysis.

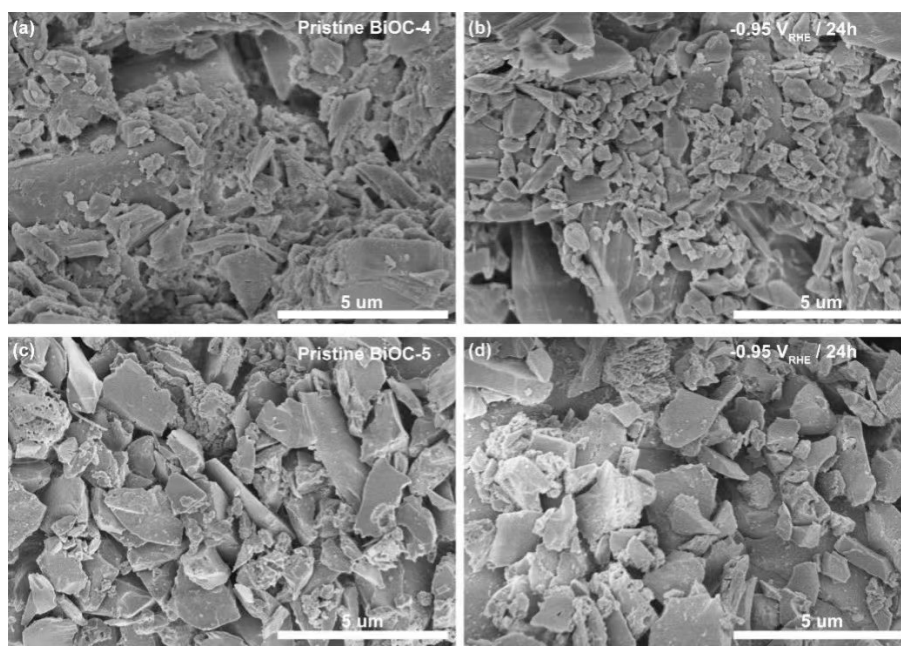

**Figure S28.** The SEM images of **BiOC-4** and **BiOC-5** before and after 24 h electrocatalysis.

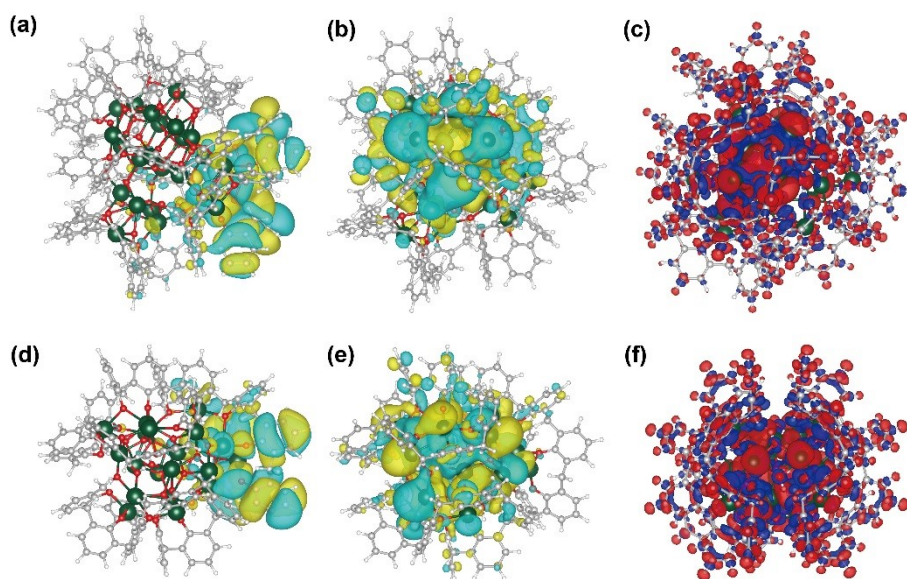

**Figure S29.** (a) and (d) the 3-D plot of HOMO of **BiOC-5** and **BiOC-4**, (b) and (e) the 3-D plot of LOMO of **BiOC-5** and **BiOC-4**, (c) and (f) the electron density difference of **BiOC-5** and **BiOC-4**.

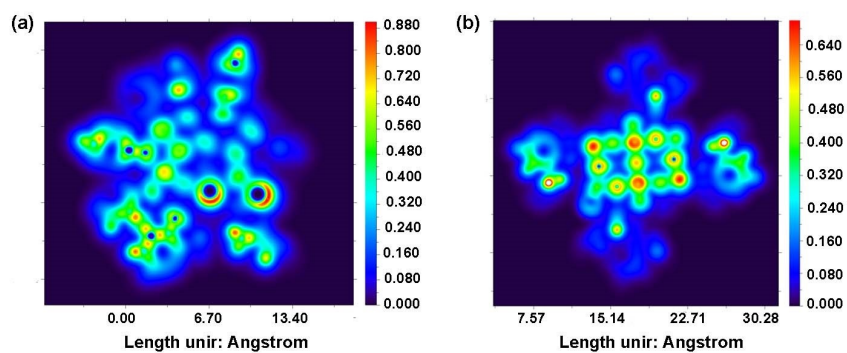

Figure S30. The localized orbital locator maps for BiOC-4 (a) and BiOC-5 (b).

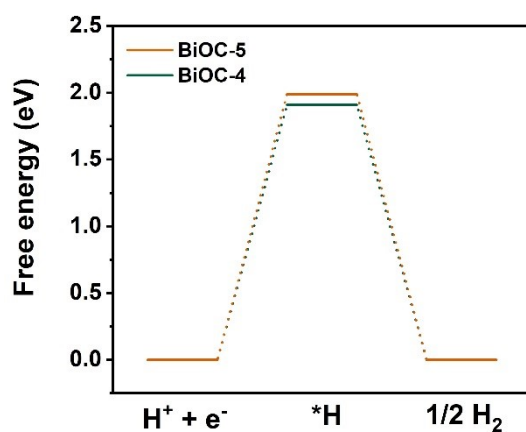

Figure S31. Free-energy diagrams for  $H_2$  on BiOC-4 and BiOC-5.

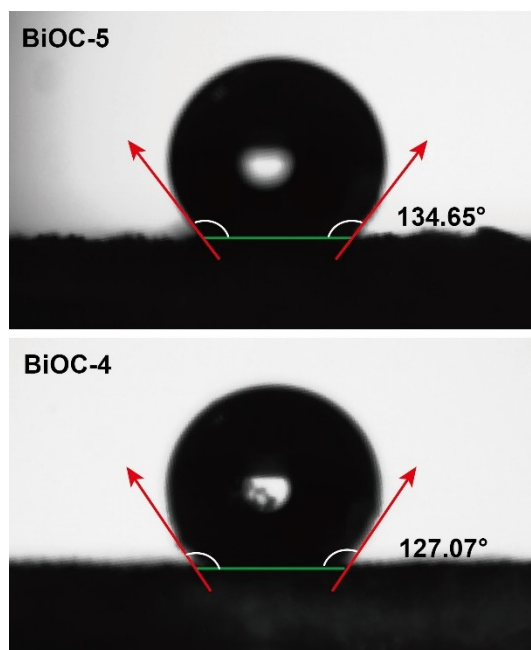

Figure S32. Contact angles of BiOC-4 and BiOC-5.

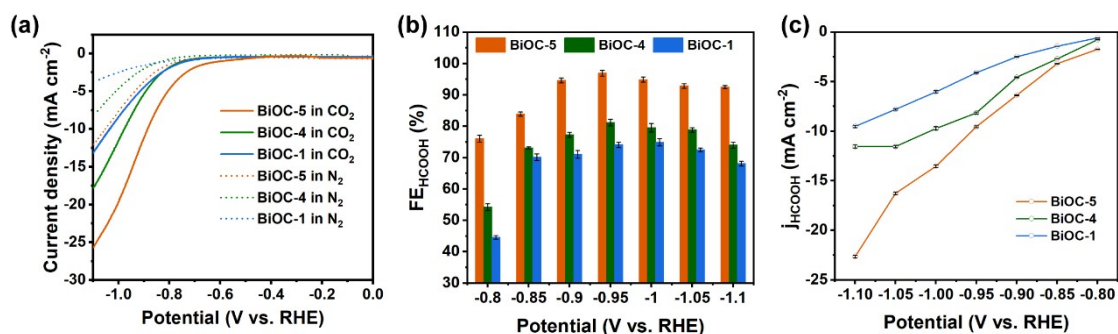

**Figure. S33.** (a) Polarization curves of **BiOC-1**, **BiOC-4** and **BiOC-5** in  $\text{N}_2$  or  $\text{CO}_2$  saturated 0.5 M  $\text{KHCO}_3$ . (b) Faradaic efficiencies of production and (c) the current densities of formate at different working potentials in  $\text{CO}_2$ -saturated 0.5 M  $\text{KHCO}_3$  electrolyte for **BiOC-1**, **BiOC-4** and **BiOC-5**.

**Table S1.** The Crystallographic data for **BiOC-1**, **BiOC-2**, **BiOC-3**, **BiOC-4**, **BiOC-5** and **BiOC-6**.

| Compound                                           | <b>BiOC-1</b>                                                   | <b>BiOC-2</b>                                                   | <b>BiOC-3</b>                                            | <b>BiOC-4</b>                                                       | <b>BiOC-5</b>                                                       | <b>BiOC-6</b>                                                                       |
|----------------------------------------------------|-----------------------------------------------------------------|-----------------------------------------------------------------|----------------------------------------------------------|---------------------------------------------------------------------|---------------------------------------------------------------------|-------------------------------------------------------------------------------------|
| Empirical formula                                  | $\text{C}_{97}\text{H}_{140}\text{Bi}_4\text{N}_2\text{O}_{17}$ | $\text{C}_{93}\text{H}_{121}\text{Bi}_4\text{N}_2\text{O}_{13}$ | $\text{C}_{183}\text{H}_{231}\text{NaBi}_8\text{O}_{27}$ | $\text{C}_{294}\text{H}_{392}\text{Bi}_{20}\text{N}_9\text{O}_{61}$ | $\text{C}_{384}\text{H}_{514}\text{N}_6\text{Bi}_{24}\text{O}_{79}$ | $\text{C}_{694}\text{H}_{1067}\text{Bi}_{40}\text{Mo}_2\text{N}_{47}\text{O}_{172}$ |
| Formula weight                                     | 2440.73                                                         | 2312.83                                                         | 4572.23                                                  | 9202.73                                                             | 11486.34                                                            | 21357.71                                                                            |
| Crystal system                                     | Monoclinic                                                      | Triclinic                                                       | Tetragonal                                               | Monoclinic                                                          | Tetragonal                                                          | Triclinic                                                                           |
| Space group                                        | $P2_1/c$                                                        | $P-1$                                                           | $I4_1/a$                                                 | $P2_1/c$                                                            | $I4_1/acd$                                                          | $P-1$                                                                               |
| Temperature (K)                                    | 173.02                                                          | 173.02                                                          | 173.02                                                   | 173.02                                                              | 173.02                                                              | 173.02                                                                              |
| Wavelength ( $\text{\AA}$ )                        | 0.71073                                                         | 1.54178                                                         | 0.71073                                                  | 1.54178                                                             | 1.54178                                                             | 1.54178                                                                             |
| $a$ ( $\text{\AA}$ )                               | 25.93(6)                                                        | 16.570(4)                                                       | 22.5610(4)                                               | 22.208(2)                                                           | 35.3979(8)                                                          | 22.5724(15)                                                                         |
| $b$ ( $\text{\AA}$ )                               | 13.52(3)                                                        | 17.360(4)                                                       | 22.5610(4)                                               | 37.888(4)                                                           | 35.3979(8)                                                          | 23.0297(14)                                                                         |
| $c$ ( $\text{\AA}$ )                               | 30.86(7)                                                        | 19.896(5)                                                       | 80.946(4)                                                | 44.949(4)                                                           | 67.034(3)                                                           | 36.361(2)                                                                           |
| $\alpha$ ( $^\circ$ )                              | 90                                                              | 67.924(11)                                                      | 90                                                       | 90                                                                  | 90                                                                  | 92.631(4)                                                                           |
| $\beta$ ( $^\circ$ )                               | 106.94(6)                                                       | 78.114(12)                                                      | 90                                                       | 100.421(4)                                                          | 90                                                                  | 103.905(4)                                                                          |
| $\gamma$ ( $^\circ$ )                              | 90                                                              | 83.852(11)                                                      | 90                                                       | 90                                                                  | 90                                                                  | 115.578(3)                                                                          |
| Volume ( $\text{\AA}^3$ )                          | 10351(41)                                                       | 5187(2)                                                         | 41201(5)                                                 | 37197(6)                                                            | 83994(5)                                                            | 16306.2(18)                                                                         |
| $Z$                                                | 4                                                               | 2                                                               | 8                                                        | 4                                                                   | 8                                                                   | 1                                                                                   |
| $D_{\text{calc.}}$ / $\text{mg}\cdot\text{m}^{-3}$ | 1.423                                                           | 1.479                                                           | 1.410                                                    | 1.505                                                               | 1.677                                                               | 1.764                                                                               |
| $\mu/\text{mm}^{-1}$                               | 6.827                                                           | 13.492                                                          | 6.864                                                    | 18.543                                                              | 19.745                                                              | 21.269                                                                              |
| $F(000)$                                           | 4312.0                                                          | 2258.0                                                          | 16936.0                                                  | 15756.0                                                             | 39936.0                                                             | 8112.0                                                                              |
| $2\theta$ range for data collection ( $^\circ$ )   | 4.71 to 50.528                                                  | 4.872 to 128.1                                                  | 4.768 to 50.164                                          | 4.046 to 128.272                                                    | 5.646 to 127.73                                                     | 4.988 to 128.292                                                                    |
| Reflections                                        | 49915                                                           | 72620                                                           | 79501                                                    | 297755                                                              | 183395                                                              | 179869                                                                              |



|                                   |                                                   |                                                   |                                                   |                                                   |                                                   |                                                   |
|-----------------------------------|---------------------------------------------------|---------------------------------------------------|---------------------------------------------------|---------------------------------------------------|---------------------------------------------------|---------------------------------------------------|
| collected                         |                                                   |                                                   |                                                   |                                                   |                                                   |                                                   |
| Independent reflections           | 18394 [R <sub>(int)</sub> = 0.0996]               | 17011 [R <sub>(int)</sub> = 0.0584]               | 18200 [R <sub>(int)</sub> = 0.1072]               | 61522 [R <sub>(int)</sub> = 0.0643]               | 17336 [R <sub>(int)</sub> = 0.0867]               | 52651 [R <sub>(int)</sub> = 0.1527]               |
| Goodness-of-fit on F <sup>2</sup> | 1.014                                             | 1.076                                             | 1.022                                             | 1.021                                             | 1.042                                             | 1.023                                             |
| Final R indices [I > 2sigma(I)]   | R <sub>1</sub> = 0.0478, wR <sub>2</sub> = 0.1112 | R <sub>1</sub> = 0.0581, wR <sub>2</sub> = 0.1356 | R <sub>1</sub> = 0.0544, wR <sub>2</sub> = 0.1166 | R <sub>1</sub> = 0.0638, wR <sub>2</sub> = 0.1712 | R <sub>1</sub> = 0.0566, wR <sub>2</sub> = 0.1605 | R <sub>1</sub> = 0.0895, wR <sub>2</sub> = 0.2027 |

**Table S2** Summary and comparison of the catalytic performance with other Bi-based electrocatalysts materials for ECR to formic acid.

| Catalyst                                | Electrolyte                   | Potential             | FE <sub>HCOOH</sub> | TOF                                  |
|-----------------------------------------|-------------------------------|-----------------------|---------------------|--------------------------------------|
| <b>BiOC-5</b>                           | <b>0.5 M KHCO<sub>3</sub></b> | <b>-0.95 V vs RHE</b> | <b>97%</b>          | <b>405.7 h<sup>-1</sup></b>          |
| Bi <sub>3</sub>                         | 0.5 M KHCO <sub>3</sub>       | -1.3 V vs RHE         | 96.37               | 377.55 h <sup>-1</sup>               |
| Bi-MOF                                  | 0.1 M KHCO <sub>3</sub>       | -0.9 V vs RHE         | 92.2                | 526.9 h <sup>-1</sup>                |
| Bi <sub>2</sub> O <sub>3</sub> NSs@MCCM | 0.1 M KHCO <sub>3</sub>       | -1.265 V vs RHE       | 93.8%               | /                                    |
| MOF-derived Bi NPs                      | 0.5 M KHCO <sub>3</sub>       | -0.97 V vs RHE        | 95%                 | 16 × 10 <sup>3</sup> h <sup>-1</sup> |
| 3.5 nm Bi NSs                           | 0.1 M KHCO <sub>3</sub>       | -1.1 V vs RHE         | 92%                 | /                                    |
| elongated Bismuth oxides                | 0.5 M KHCO <sub>3</sub>       | -0.9 V vs RHE         | 91%                 | /                                    |
| Oxide-derived Bi                        | 0.5 M KHCO <sub>3</sub>       | -0.82 V vs RHE        | 82%                 | /                                    |
| Bi dendrite                             | 0.5 M KHCO <sub>3</sub>       | -0.74 V vs RHE        | 89%                 | /                                    |
| Bi <sub>2</sub> O <sub>3</sub> @C       | 0.5 M KHCO <sub>3</sub>       | -0.9 V vs RHE         | 92%                 | /                                    |
| Bi <sub>2</sub> O <sub>3</sub> -NGQD    | 0.5 M KHCO <sub>3</sub>       | -0.9 V vs RHE         | 98.1%               | /                                    |
| POD-Bi                                  | 0.5 M KHCO <sub>3</sub>       | -1.16 V vs RHE        | 95%                 | /                                    |
| Bi-ene                                  | 0.5 M KHCO <sub>3</sub>       | -0.88 V vs RHE        | ~100%               | /                                    |
| BiNS                                    | 0.5 M NaHCO <sub>3</sub>      | -1.06 V vs RHE        | 80%                 | /                                    |
| Bi nanosheets                           | 0.1 M KHCO <sub>3</sub>       | -1.1 V vs RHE         | 86%                 | /                                    |
| SD-Bi                                   | 0.5 M KHCO <sub>3</sub>       | -0.75 V vs RHE        | 84%                 | /                                    |
| BOCNS                                   | 0.5 M NaHCO <sub>3</sub>      | -0.7 V vs RHE         | 85%                 | /                                    |
| BiO <sub>x</sub> /C                     | 0.5 M NaHCO <sub>3</sub>      | -1.13 V vs RHE        | ~93.4%              | /                                    |

|                 |                         |                |       |   |
|-----------------|-------------------------|----------------|-------|---|
| BiBrO templated | 0.1 M KHCO <sub>3</sub> | -0.9 V vs RHE  | 95%   | / |
| Bi NSs          | 0.1 M KHCO <sub>3</sub> | -0.98 V vs RHE | 95.5% | / |
| Bi NTs          | 0.5 M KHCO <sub>3</sub> | -1.1 V vs RHE  | 93%   | / |

**Table S3** The vertical ionization energy of BiOC-4 and BiOC-5

| Oxidation state | BiOC-4 | BiOC-5 |
|-----------------|--------|--------|
| 0               | 0      | 0      |
| +1              | 156.11 | 79.759 |
|                 | 2      |        |

## Reference

- [1] G. Kresse, J. Hafner, *Phys. Rev. B* **1993**, *48*, 13115–13118.
- [2] G. Kresse, J. Furthmüller, *Phys. Rev. B* **1996**, *54*, 11169–11186.
- [3] G. Kresse, J. Furthmüller, *Comput. Mater. Sci.* **1996**, *6*, 15–50.
- [4] J. P. Perdew, K. Burke, *Phys. Rev. Lett.* **1996**, *77*, 3865–3868.
- [5] P. E. Blöchl, *Phys. Rev. B* **1994**, *50*, 17953–17979.
- [6] K. Mathew, V. S. C. Kolluru, S. Mula, S. N. Steinmann, R. G. Hennig, *J. Chem. Phys.* **2019**, *151*, 234101.
- [7] K. Mathew, R. Sundararaman, K. Letchworth–Weaver, T. A. Arias, R. G. Hennig, *J. Chem. Phys.* **2014**, *140*, 084106.
- [8] J. K. Nørskov, J. Rossmeisl, A. Logadottir, L. Lindqvist, J. R. Kitchin, T. Bligaard, H. Jónsson, *J. Phys. Chem. B* **2004**, *108*, 17886–17892.
- [9] M. J. Frisch, G. W. Trucks, H. B. Schlegel, Gaussian 16, Revision C. 01, Gaussian, Inc., Wallingford CT, 2019.
- [10] A. D. Becke, *J Chem Phys.* **1993**, *98*, 5648–5653.
- [11] A. D. Becke, *J Chem Phys.* **1988**, *38*, 3098–3100.
- [12] L. Tian, Multiwfn Manual, version 3.7(dev), Section 4.8.5.
- [13] T. Lu, F. Chen, *J. Comput. Chem.* **2012**, *33*, 580–592.
- [14] S. B. Liu, X. F. Lu, J. Xiao, X. Wang, X. W. Lou, *Angew. Chem. Int. Ed.* **2019**, *58*, 13828–13833.
- [15] P. Lamagni, M. Miola, J. Catalano, M. S. Hvid, M. A. H. Mamakhel, M. Christensen, M. R. Madsen, H. S. Jeppesen, X. M. Hu, K. Daasbjerg, T. Skrydstrup, N. Lock, *Adv. Fund. Mater.* **2020**, *30*, 1910408.
- [16] D. Z. Yao, C. Tang, A. Vasileff, Y. Zhi, Y. Jiao, S. Z. Qiao, *Angew. Chem. Int. Ed.* **2021**, *60*, 18178–18184.
- [17] P. L. Deng, H. M. Wang, R. J. Qi, J. X. Zhu, S. H. Chen, F. Yang, L. Zhou, K. Qi, H. F. Liu, Y. X. Bao, *ACS Catal.* **2020**, *10*, 743–750.
- [18] E. Bertin, S. Garbarino, C. Roy, S. Kazemi, D. Guay, *J. CO<sub>2</sub> Util.* **2017**, *19*, 276–283.
- [19] J. H. Koh, D. H. Won, T. Eom, N. K. Kim, K. D. Jung, H. Kim, Y. J. Hwang, B. K. Min, *ACS Catal.* **2017**, *7*, 5071–5077.
- [20] P. L. Deng, F. Yang, Z. T. Wang, S. H. Chen, Y. Z. Zhou, S. Zaman, Y. X. Bao, *Angew. Chem. Int. Ed.* **2020**, *132*, 10899–10905.
- [21] Z. P. Chen, K. W. Mou, X. H. Wang, L. C. Liu, *Angew. Chem. Int. Ed.* **2018**, *130*, 12972–12976.
- [22] S. S. He, F. L. Ni, Y. L. Ji, L. Wang, Y. Z. Wen, H. P. Bai, G. J. Liu, Y. Zhang, Y. Y. Li, B. Zhang, H. S. Peng, *Angew. Chem. Int. Ed.* **2018**, *57*, 16114–16119.
- [23] C. S. Cao, D. D. Ma, J. F. Gu, X. Y. Xie, G. Zeng, X. F. Li, S. G. Han, Q. L. Zhu, X. T. Wu, Q. Xu, *Angew. Chem. Int. Ed.* **2020**, *59*, 15014–15020.
- [24] N. Han, Y. Wang, H. Yang, J. Deng, J. H. Wu, Y. F. Li, Y. G. Li, *Nat. Commun.* **2018**, *9*, 1320.
- [25] W. J. Zhang, Y. Hu, L. B. Ma, G. Y. Zhu, P. Y. Zhao, X. I. Xue, R. P. Chen, S. Y. Yang, J. Ma, J. Liu, Z. Jin, *Nano Energy* **2018**, *53*, 808–816.
- [26] Y. Zhang, F. W. Li, X. L. Zhang, T. Williams, C. D. Easton, A. M. Bond, J. Zhang, *J. Mater. Chem. A.* **2018**, *6*, 4714–4720.
- [27] Y. Zhang, X. L. Zhang, Y. Z. Ling, F. W. Li, A. M. Bond, J. Zhang, *Angew. Chem. Int. Ed.* **2018**, *57*, 13283–13287.
- [28] C. W. Lee, J. S. Hong, K. D. Yang, K. Jin, J. H. Lee, H. Y. Ahn, H. Seo, N. E. Sung, K. T. ACS Catal. **2018**, *8*, 931–937.

- [29] F. P. G. D. Arquer, O. S. Bushuyev, P. De Luna, C. T. Dinh, A. Seifitokaldani, M. I. Saidaminov, C. S. Tan, L. N. Quan, A. Proppe, M. G. Kibria, S. O. Kelley, D. Sinton, E. H. Sargent, *Adv. Mater.* **2018**, *30*, 1802858.
- [30] J. Yang, X. L. Wang, Y. T. Qu, X. Wang, H. Huo, Q. K. Fan, J. Wang, L. M. Yang, Y. E. Wu, *Adv. Energy Mater.* **2020**, *10*, 2001709.
- [31] K. Fan, Y. F. Jia, Y. F. Ji, P. Y. Kuang, B. C. Zhu, X. Y. Liu, J. G. Yu, *ACS Catal.* **2020**, *10*, 358–364.
- [32] T. P. Thanh, D. Rahman, F. Zelio, Z. P. Ma, R. Amal, A. Tricol, *Adv. Fund. Mater.* **2020**, *30*, 1906478.
- [33] Y. T. Wang, Y. H. Li, J. Z. Liu, C. X. Dong, C. Q. Xiao, L. Cheng, H. L. Jiang, H. Jiang, C. Z. Li, *Angew. Chem. Int. Ed.* **2021**, *60*, 7681–7685.
